# Supplementary material for: Arc-like magmas generated by mélange-peridotite interaction in the mantle wedge
Source: Springer Nature journal article supplement (doi:10.1038/s41467-018-05313-2), 2018-07-16
Supplement: MOESM3 [file 41467_2018_5313_MOESM3_ESM.pdf]

## **Description of Additional Supplementary Files**

**File Name: Supplementary Data 1**

**Description:** Major and trace element compositions of starting materials.

**File Name: Supplementary Data 2**

**Description:** Major and trace element compositions of experimental peridotite-mélange melts.

**File Name: Supplementary Data 3**

**Description:** Summary of experimental set-up.

**File Name: Supplementary Data 4**

**Description:** Compiled major and trace element compositions of experimental melts from other studies on mantle wedge hybridization.

**File Name: Supplementary Data 5**

**Description:** Major element composition of mineral phases analyzed by EPMA.
