# Supplementary material for: Arc-like magmas generated by mélange-peridotite interaction in the mantle wedge
Source: Nat Commun. 2018 Jul 20;9:2864. doi: 10.1038/s41467-018-05313-2 (PMC6054672; doi:10.1038/s41467-018-05313-2)
Supplement: Supplementary file 4 — Supplementary Data 1 [file 41467_2018_5313_MOESM4_ESM.xlsx]

## Sheet: Dataset 1
Dataset 1. Major and trace element compositions of starting materials
			Major elements (wt. %) normalized to 100													Trace elements (ppm)
Sample	Description	Modal mineralogy (wt. %)	SiO2	TiO2	Al2O3	FeOT	MnO	MgO	CaO	Na2O	K2O	P2O5	LOI %	Density		Rb	Sr	Y	Zr	Nb	Cs	Ba	La	Ce	Pr	Nd	Sm	Eu	Gd	Tb	Dy	Ho	Er	Tm	Yb	Lu	Hf	Ta	Pb	Th	U
LZ-1	Lherzolitic section of LN12-18 (Le Roux et al., 2016)	Ol-60, Opx-25, Cpx-12.5, Sp-2.5	47.1792	0.135747	3.89917	7.52213	0.129659	37.6345	3.32063	0.17815	0.001	0.000766836		3.3		0.0719925	14.4697	3.36957	5.95561	0.0657214	0.00133934	0.867853	0.230308	0.764705	0.137903	0.718223	0.285655	0.133571	0.438725	0.0832355	0.599716	0.13138	0.375143	0.0564078	0.364466	0.0591807	0.180389	0.00547824	0.109978	0.0359096	0.0102587
SY400B	Chlorite-omphacite schist (sediment-dominated melange)	Ep-10, Phe- 21.4, Chl-10, Rt-0.83, Ttn-0.50, Ap-0.22, Tur-3.4, Omph-53	51.4584	1.14965	17.2086	5.7545	0.118357	8.4662	8.38628	5.10527	2.26323	0.0895386	2.37201	3.169		48.1226	180.961	43.8977	162.734	6.48105	0.67628	374.94	9.87851	27.3864	4.02563	17.7041	5.15974	1.31541	6.03105	1.1556	7.65452	1.66291	4.84693	0.740886	4.85994	0.753185	4.762	0.420065	2.34281	0.94778	0.392027
SY325	Talc-chlorite-actinolite schist (serpentine-dominated melange)	Ca-amph-65, Chl-20, Tlc-15, minor Rt	57.7443	0.0704534	2.4183	7.41779	0.244595	22.7775	7.70536	1.5289	0.0907706	0.00210193	2.13195	3.047		0.216833	16.284	20.7953	8.4684	0.423181	0.0266978	2.17105	0.771196	1.91475	0.326379	2.00086	1.30508	0.49451	2.60992	0.589561	4.02572	0.815148	2.27924	0.34723	2.15427	0.321402	0.230008	0.0245962	1.49909	0.0797029	0.163194
PER-SED (95-5)	95 vol. % LZ-1 + 5 vol. % SY400B		47.3855	0.184613	4.54063	7.43693	0.129114	36.2287	3.56477	0.415614	0.110029	0.00504522	0.11432	3.29369		2.38781	22.4939	5.32284	13.5116	0.37491	0.0338683	18.8964	0.695307	2.04775	0.325273	1.53686	0.520564	0.19053	0.708249	0.134918	0.939725	0.205193	0.590662	0.0893965	0.581127	0.0926284	0.401201	0.0254594	0.21759	0.0798575	0.0286581
PER-SED (85-15)	85 vol. % LZ-1 + 15 vol. % SY400B		47.8005	0.282948	5.83147	7.2655	0.128018	33.3998	4.05607	0.893481	0.329435	0.0136549	0.344374	3.28098		7.0481	38.6414	9.25354	28.7171	0.997114	0.0993288	55.1765	1.63106	4.62971	0.702332	3.18427	0.993287	0.305153	1.25063	0.238923	1.62395	0.353732	1.02437	0.155782	1.01713	0.159938	0.845558	0.065669	0.434146	0.168297	0.0656847
PER-SERP (85-15)	85 vol. % LZ-1 + 15 vol. % SY325		48.6591	0.126601	3.69174	7.50751	0.145758	35.5534	3.93482	0.367355	0.0135745	0.000953849	0.298631	3.26456		0.0922809	14.7239	5.81047	6.30759	0.115792	0.0048914	1.0504	0.306073	0.925796	0.164304	0.897888	0.428451	0.184129	0.742854	0.154159	1.07961	0.227158	0.641857	0.0971445	0.615172	0.0959112	0.187339	0.00815618	0.304557	0.0420439	0.0316809
