# Supplementary material for: Arc-like magmas generated by mélange-peridotite interaction in the mantle wedge
Source: Nat Commun. 2018 Jul 20;9:2864. doi: 10.1038/s41467-018-05313-2 (PMC6054672; doi:10.1038/s41467-018-05313-2)
Supplement: Supplementary file 5 — Supplementary Data 2 [file 41467_2018_5313_MOESM5_ESM.xlsx]

## Sheet: Dataset 2
Dataset 2. Major and trace element compositions of experimental peridotite-melange melts
	Major elements (wt. %) normalized to 100												Trace elements (ppm)
	EPMA (± 1 s.d)												SIMS (± 2 s.e.**)
Experiment	n*	SiO2	TiO2	Al2O3	FeOT	MnO	MgO	CaO	Na2O	K2O	P2O5		n*	Sr ppm	Y ppm	Zr ppm	Nb ppm	Ba ppm	Ce ppm	Nd ppm	Sm ppm	Yb ppm	Hf ppm	Th*** ppm
PER-SED 95-5_1280_3	12	53.1342	0.895381	19.5502	4.22407	0.0718394	8.15786	9.07351	3.68611	1.12668	0.0801329
		1.11085	0.084338	0.263191	0.397265	0.0140041	0.458415	0.355953	0.684381	0.135389	0.0287848
PER-SED 95-5_1280_24	5	52.131	0.992457	18.7811	4.06466	0.078258	9.96887	10.3216	2.36661	1.08304	0.212461
		1.75003	0.0911112	1.32026	0.405746	0.0181515	2.32986	1.08528	0.0668581	0.16529	0.0212592
PER-SED 95-5_1280_48	7	55.5727	0.896221	19.381	4.52973	0.0533511	7.84634	8.88513	1.28456	1.41194	0.138961
		1.25424	0.0276819	0.443648	0.379404	0.0074802	0.502129	0.201329	0.186922	0.0152753	0.0144578
PER-SED 95-5_1280_72	4	56.5225	1.00058	18.4526	1.61486	0.0535268	7.01281	7.72717	5.31998	2.02486	0.271029		1	181.972	16.258	142.26	5.67742	323.52	16.7244	11.0157	2.98104	2.1	3.01437	0.33
		1.04752	0.0545476	0.116905	0.219773	0.00794775	0.740945	0.158745	0.0906918	0.0899537	0.0185802			7.67145	0.853196	6.46384	0.707127	12.7823	1.41513	2.02493	1.1862	0.647533	0.945139	0.47
PER-SED 95-5_1280_96	6	54.528	0.982537	18.921	5.27417	0.0463416	9.01266	8.29645	0.875716	1.77612	0.28699
		0.336497	0.0201103	0.177172	0.154585	0.0103789	0.168097	0.174776	0.0655536	0.0348807	0.0379036
PER-SED 95-5_1315_72	12	51.127	0.610552	14.772	3.62511	0.106125	15.8706	11.528	1.82537	0.396707	0.138605		3	110.444	18.3179	54.2949	1.67643	101.615	6.78316	5.88976	2.27305	1.65301	1.39288	0.28
		0.695997	0.0374473	0.855071	0.192337	0.0133897	0.848954	0.42432	0.354005	0.0658817	0.112563			4.94286	0.96099	3.02432	0.424248	5.02895	0.691847	1.52112	1.01473	0.563839	0.647858	0.32
PER-SED 85-15_1280_72	9	51.7311	1.23103	19.549	3.33332	0.0905164	7.1935	7.86537	6.576	2.23883	0.191354		1	199.409	31.5905	138.359	6.09076	290.183	19.182	14.2055	4.17815	3.06685	2.87377	0.505869
		0.301515	0.0371139	0.224914	0.484651	0.0149124	0.303237	0.306431	0.230784	0.0809492	0.0401388			8.22452	1.26323	6.12042	0.639257	11.2911	1.55515	2.02272	1.11282	0.710753	0.772374	0.34181
PER-SED 85-15_1315_72	13	51.5837	0.913148	16.358	2.37937	0.0955692	12.9117	10.7817	3.53788	1.32187	0.116964		1	135.095	26.4247	109.27	3.85671	239.055	15.2092	11.7187	2.99024	2.83474	2.66876	0.547621
		0.31451	0.0281048	0.217548	0.219487	0.0152918	0.226113	0.137868	0.127596	0.0489636	0.0212915			5.76517	1.13989	5.04737	0.552161	9.62395	1.28169	1.99521	1.13777	0.740064	0.842438	0.463304
PER-SERP 85-15_1280_72	7	54.379	0.806148	18.421	2.09677	0.075469	8.86757	8.71905	6.09809	0.37883	0.158058		1	180.064	21.6356	53.4702	2.3654	37.0728	10.2579	9.93906	3.43544	2.2078	1.27098	-
		0.477788	0.0380758	0.323301	0.179788	0.00726518	0.496521	0.319315	0.13901	0.0111361	0.0236189			7.49882	0.972931	2.77522	0.422359	2.25333	0.903633	1.68726	1.03552	0.578379	0.502621	-
PER-SERP 85-15_1315_72	10	51.9378	0.781149	16.9675	2.86876	0.0939952	11.4801	10.5981	4.89833	0.268877	0.105378		1	166.246	30.7469	63.1541	1.85437	28.2099	8.01405	8.16461	2.93487	2.99649	1.40963	-
		0.547077	0.0220059	0.594605	0.162138	0.00869637	1.02142	0.291298	0.430782	0.015097	0.0320165			7.05127	1.31819	3.28895	0.429209	2.02758	0.766941	1.72627	1.12436	0.796105	0.643468	-
PER-SERP 85-15_1350_72	7	49.8519	0.573152	15.5005	2.76043	0.112509	15.5892	12.8912	2.48148	0.117681	0.121967		1	90.8122	22.1613	78.7649	2.7594	25.7162	6.3503	8.77554	2.38359	2.87566	1.87685	0.44
		0.182339	0.022625	0.0961645	0.0407665	0.0122372	0.338498	0.117595	0.0519615	0.00393125	0.0114795			4.15545	1.08405	4.0107	0.532767	2.00633	0.66116	1.86012	1.11302	0.82089	0.736551	0.47
*n indicates number of individual analysis. Most melt pools are too small to perform multiple analyses
numbers in italics are errors (± 1 s.d for EPMA, ±2 s.e. for SIMS)
** Total 2 SE reported here include 2SE internal error from analyses (n = 5 cycles) propagated with 2SE error from calibration curves
*** value is reported if 1SE error is above detection limit. Like for other elements, 2SE are reported in italics
