# Supplementary material for: Arc-like magmas generated by mélange-peridotite interaction in the mantle wedge
Source: Nat Commun. 2018 Jul 20;9:2864. doi: 10.1038/s41467-018-05313-2 (PMC6054672; doi:10.1038/s41467-018-05313-2)
Supplement: Supplementary file 6 — Supplementary Data 3 [file 41467_2018_5313_MOESM6_ESM.xlsx]

## Sheet: Dataset 3
Dataset 3. Summary of experimental set-up
Experiments	Goal of the experiment	Temperature (oC)	Pressure (GPa)	Run duration (h)	Starting mix	Phases*
PER-SED 95-5_1150_96	solidus assemblage	1150	1.5	96	PER-SED (95-5)	olivine + orthopyroxene + clinopyroxene + spinel (± isolated melt drops)
PER-SED 95-5_1280_3	time-series	1280	1.5	3	PER-SED (95-5)	melt + olivine + orthopyroxene + clinopyroxene
PER-SED 95-5_1280_24	time-series	1280	1.5	24	PER-SED (95-5)	melt (0.13) + olivine (0.42) + orthopyroxene (0.35) + clinopyroxene (0.1)
PER-SED 95-5_1280_48	time-series	1280	1.5	48	PER-SED (95-5)	melt (0.09) + olivine (0.42) + orthopyroxene (0.35) + clinopyroxene (0.14)
PER-SED 95-5_1280_72	time-series / melt composition	1280	1.5	72	PER-SED (95-5)	melt (0.1) + olivine (0.44) + orthopyroxene (0.29) + clinopyroxene (0.17)
PER-SED 95-5_1280_96	time-series	1280	1.5	96	PER-SED (95-5)	melt (0.1) + olivine (0.42) + orthopyroxene (0.35) + clinopyroxene (0.13)
PER-SED 95-5_1315_72	melt composition	1315	1.5	72	PER-SED (95-5)	melt (0.25) + olivine (0.4) + orthopyroxene (0.34) + clinopyroxene (0.01)
PER-SED 85-15_1230_96	near-solidus assemblage	1230	1.5	96	PER-SED (85-15)	melt + olivine + orthopyroxene + clinopyroxene + minor spinel
PER-SED 85-15_1280_72	melt composition	1280	1.5	72	PER-SED (85-15)	melt (0.19) + olivine (0.4) + orthopyroxene (0.27) + clinopyroxene (0.14)
PER-SED 85-15_1315_72	melt composition	1315	1.5	72	PER-SED (85-15)	melt (0.31) + olivine (0.36) + orthopyroxene (0.31) + clinopyroxene (0.02)
PER-SERP 85-15_1230_96	near-solidus assmeblage	1230	1.5	96	PER-SERP (85-15)	melt + olivine + orthopyroxene + clinopyroxene + minor spinel
PER-SERP 85-15_1280_72	melt composition	1280	1.5	72	PER-SERP (85-15)	melt (0.03) + olivine (0.33) + orthopyroxene (0.46) + clinopyroxene (0.18)
PER-SERP 85-15_1315_72	melt composition	1315	1.5	72	PER-SERP (85-15)	melt (0.11) + olivine (0.34) + orthopyroxene (0.41) + clinopyroxene (0.14)
PER-SERP 85-15_1350_72	melt composition	1350	1.5	72	PER-SERP (85-15)	melt (0.25) + olivine (0.4) + orthopyroxene (0.34) + clinopyroxene (0.01)
						* values in the parentheses are calculated phase fraction from the mass balance
