# Supplementary material for: Arc-like magmas generated by mélange-peridotite interaction in the mantle wedge
Source: Nat Commun. 2018 Jul 20;9:2864. doi: 10.1038/s41467-018-05313-2 (PMC6054672; doi:10.1038/s41467-018-05313-2)
Supplement: Supplementary file 7 — Supplementary Data 4 [file 41467_2018_5313_MOESM7_ESM.xlsx]

## Sheet: Dataset 4
Dataset 4. Compiled major and trace element compositions of experimental melts from other studies on mantle wedge hybridization
			Major elements (wt. %) normalized to 100												Trace elements (ppm)
Literature		Experiments	SiO2	TiO2	Al2O3	FeOT	MnO	MgO	CaO	Na2O	K2O	P2O5	Cr2O3		Sr	Y	Zr	Nb	Ba	Ce	Nd	Sm	Yb	Hf	Th	U
Pirard and Hermann (2015)	melts produced from olivine hybridized by sediment melts	D1078 Low K P-H	60.6452	0.606452	16.9032	2.58065	0.0387097	5.29032	1.54839	9.80645	2.58065				333	26	279	68	384	71	50	47	24	47	33	21
		D1064 Low K P-H	54.7742	0.621762	15.544	4.44115	0.0444115	6.36566	0.888231	13.9156	3.40489				444	31	421	115	176	120	77	63	27	64	59	38
		D1077 Low K P-H	52.8541	0.264271	15.4598	5.15328	0.237844	12.2886	2.37844	6.60677	4.75687				258	22	193	53	518	59	41	37	21	32	27	18
		D891 High K P-H	54.5244	0.916473	15.0812	5.10441	0.12761	10.6729	1.97216	7.5406	4.06032				1317	32	514	170	886	211	140	122	21	80	74	75
		D979 High K P-H	59.6853	0.586001	14.7585	5.2089	0.119371	7.92187	1.19371	7.48779	3.03852				470	62	370	108	981	99	82	76	25	57	48	33
Rapp et al. (1999)	melts produced from mantle hybridized by slab melts	AB-1+10 AVX-51	65.8051	1.99135	12.984	4.07322	0.0804586	2.76576	2.16233	6.28583	3.85196				1471	11	-	9.7	1670	57.7	35	7.71	0.84	-	2.52	-
		AB-1+16 AVX-51	61.4874	2.20388	13.0623	5.53487	0.110697	3.96498	2.26426	6.21918	5.15246				815	5.8	246			48.8	39.5	9.2	1.3
		AB-1+12 KLB-1	66.0793	2.00362	12.6863	4.04752	0.0402739	2.37616	2.01369	3.71526	7.03786				1560	9	358	11.4	1861	60	37.3	7.33	0.5	8.2	1.87	0.63
		AB-1+15 KLB-1	64.7272	1.98975	13.0942	4.41162	0.0602954	2.77359	1.98975	4.60255	6.35112				769	18.2	325			44	32.7	6.9	1.1
Mallik et al. (2015)	melts produced from mantle hybridized by sediment melts	B256	50.2361	0.602833	15.4727	6.83211	0.0803778	10.0472	0.0803778	9.0425	2.71275	4.62172	0.271275
		G301	48.2606	0.713855	14.076	7.44018	0.0804343	12.0652	0.0804343	7.84235	2.91575	6.3342	0.191032
		G303	50.3849	0.589823	13.496	7.39778	0.079976	13.5959	0.079976	7.09787	2.22933	4.92852	0.119964
		G354	42.2111	0.904523	12.0603	9.04523	0.100503	16.0804	0.100503	9.04523	5.02513	5.02513	0.40201
		G298	44.6075	0.693894	13.4814	7.13719	0.0892149	12.8866	0.0892149	10.904	3.17209	6.54243	0.396511
		G298	46.2769	0.77961	13.4933	7.7961	0.07996	13.1934	0.07996	8.1959	2.49875	7.3963	0.209895
		G300	47.1935	0.753088	13.7564	7.63129	0.0803294	14.0576	0.0803294	7.02882	2.6107	6.62717	0.180741
Castro and Gerya (2008)	melts produced from pure melange	Run2mixed Castro and Gerya, 2008	69.4881	0.858118	17.1721	1.45295	0.0390054	0.702097	2.91565	2.37933	2.49634	2.49634
Castro et al. (2013)		AC8120a-mixed Castro et al., 2013	55.4113	1.99725	17.1291	6.33609	-	4.45691	7.49705	3.96497	1.6037	1.6037
		AC8120b-mixed Castro et al., 2013	63.2101	0.895436	16.2045	2.59965	0.028885	2.49374	3.52397	3.64914	3.69728	3.69728
Skora and Blundy (2010)	melts produced from pure sediments	c10													200	2.3	75	22	276	66	65	54	1.8	43	179	285
		c9													166	1.5	106	71	384	181	142	65	1.5	57	349	268
		c7													131	10.7	138	100	299	268	231	130	14.7	59	438	258
		c8													107	14.6	158	199	246	231	235	190	21.3	60	347	214
		c12													98	19	158	193	224	215	224	192	32	58	315	195
Mallik et al. (2016)	melts produced from mantle hybridized by sediment melts	B256													1373.49	16.2004	157.151	18.5411	649.659	51.7741	22.6889	4.47756	1.36083	5.90621	7.46432	3.68742
		G301													1066.84	12.4034	117.101	13.8976	980.6	38.1349	16.7521	3.32743	1.07381	4.43327	5.49172	2.71615
		G303													828.478	10.0051	91.5997	10.7793	762.662	29.6062	13.0332	2.60542	0.886118	3.49031	4.25862	2.10665
		G297													2864.67	28.8868	374.777	46.7986	529.926	134.953	54.6321	9.77209	2.22657	12.8328	20.4202	10.0337
		G296													1501.9	14.3239	169.468	20.3256	690.413	56.7884	24.7977	4.81363	1.05864	6.36582	8.19408	4.04621
		G298													1299.95	12.5448	145.001	17.366	714.431	48.2326	21.0986	4.11666	0.940925	5.47192	6.95381	3.43552
		G300													1234.41	13.9418	134.725	16.0954	1133.21	44.1325	19.3549	3.82519	1.1876	5.0748	6.36126	3.1458
		B307													937.722	11.4623	106.17	12.4399	565.836	34.4983	15.1716	3.02471	1.00021	4.03203	4.96471	2.45445
		B307													1172.39	13.8805	132.557	15.6381	656.861	43.4254	19.0558	3.77427	1.18359	5.0006	6.25681	3.09229
		B309													764.194	9.30342	84.619	9.94001	703.677	27.3064	12.0262	2.40737	0.828296	3.2286	3.9269	1.94264
		B309													797.921	9.64142	88.2287	10.3809	734.493	28.5122	12.5523	2.50956	0.854543	3.36199	4.10124	2.02882
		G358													558.668	7.00199	62.1927	7.25962	514.956	19.9568	8.80332	1.77067	0.635434	2.38434	2.86759	1.41879
		G376													1100.27	13.8333	129.946	15.0845	422.44	42.5623	18.6922	3.71352	1.18199	4.91289	6.12897	3.02682
		G376													1170.22	13.992	133.21	15.674	612.211	43.6302	19.1491	3.79501	1.19415	5.02748	6.28566	3.10623
		G377													847.204	10.0794	93.4011	11.0263	779.282	30.2733	13.3169	2.65557	0.885527	3.54942	4.35667	2.15505
		G377													844.573	10.0518	93.1174	10.9919	776.872	30.1791	13.2757	2.64753	0.883296	3.53885	4.34308	2.14833
		G379													632.4	7.88889	70.3424	8.2198	582.889	22.594	9.96365	2.00248	0.713215	2.69493	3.24689	1.6064
		G379													656.05	8.12522	72.8757	8.5287	604.489	23.439	10.3326	2.0742	0.73138	2.78853	3.36905	1.6668
		G380													511.156	6.44989	56.9731	6.64075	471.271	18.2584	8.05704	1.62235	0.588019	2.18664	2.62305	1.29784
		G380													482.548	6.07043	53.7531	6.26897	444.787	17.2349	7.60455	1.53052	0.552711	2.06182	2.47629	1.22523
		G381													1185	14.236	135.219	15.8931	607.929	44.2746	19.4337	3.85316	1.21553	5.10615	6.37776	3.15161
		G378													775.165	9.41189	85.7908	10.0834	713.695	27.6986	12.1972	2.44053	0.836627	3.27181	3.98362	1.97067
		G378													773.775	9.31997	85.5052	10.0667	712.092	27.6471	12.1699	2.43187	0.824957	3.25617	3.97726	1.96748
		G374													682.381	8.37756	75.6766	8.87287	628.493	24.3797	10.7425	2.15342	0.750175	2.8913	3.50521	1.7341
		G374													784.094	9.42105	86.605	10.2016	721.509	28.016	12.3306	2.46299	0.832701	3.29665	4.03063	1.99386
		G375													548.514	6.8061	60.9474	7.12869	505.306	19.5922	8.63848	1.73475	0.614284	2.33236	2.8161	1.39328
		G375													646.204	7.9072	71.6178	8.40222	595.005	23.0846	10.1706	2.03773	0.707165	2.7344	3.31941	1.64219
Cruz-Uribe et al. (2018)	Melts produced from melting of sediment-dominated melange material (SY400B)	SY400-AC-1	59.7855	0.273344	21.0281	2.71619	0.0682155	1.52853	2.72687	8.07531	3.63829	0.159589			337.9	22.072	230.9	9.353	836.9	38.25	15.441	3.322	3.549	5.467	1.794	1.0074
		SY400-AC-2	60.4231	0.247914	20.7692	3.02033	0.0825981	1.66119	3.02167	7.27253	3.30184	0.199651			343.778	24.4456	368.344	10.8967	1124.22	58.0889	20.6556	3.87111	3.98333	9.76556	2.64444	1.33778
		SY400-AC-12	59.5124	0.356414	20.994	3.09279	0.098143	1.70777	2.66223	7.77421	3.62797	0.174122			356.043	23.5	242.314	10.9714	948.429	35.3857	16.5443	3.40429	3.2	5.31571	1.69857	0.948857
		SY400-AC-4	57.7268	0.531154	20.6653	4.23769	0.0753124	2.31893	2.83602	7.81389	3.62451	0.170441			360	28.8125	266.025	14.4413	991.625	47	19.725	4.43	3.65875	5.6825	1.74875	0.908
		SY400-AC-5	53.7284	0.782701	20.4501	5.94476	0.109862	4.08422	4.51457	7.19515	3.03564	0.154597			352.32	45.27	265.81	15.617	833.1	56.84	28.52	6.513	5.94	6.566	2.1924	0.9356
		Sy400B-2	51.0954	1.23914	18.9376	6.73944	0.10314	6.47723	5.79264	6.57041	2.84829	0.156492
		SY400B-3	51.7925	1.27509	20.2186	6.23649	0.104992	4.90652	5.67411	6.71523	2.91213	0.125019
		Sy400B-1	51.56	1.21989	19.0075	6.26095	0.115853	6.09659	6.52642	6.41858	2.65633	0.120068
		MEL3	51.1141	1.21915	19.1607	5.88269	0.139643	6.67049	6.85188	6.34011	2.49961	0.121544			319.733	50.4667	210.217	11.2283	927.333	29.6933	20.7917	5.86667	5.94333	5.2	0.984	0.570167
		MEL4	50.7083	1.13659	17.3624	5.63313	0.103237	9.00266	8.45529	5.30036	2.1828	0.115259			269.757	53.4857	217.971	9.62286	655.143	28.9986	21.7286	6.37	6.96857	6.33143	1.15257	0.619714
		MEL5	50.7904	1.21291	16.788	5.8059	0.132616	9.10513	8.57122	5.46183	2.0335	0.0985736			241.08	47.6	156	8.63	550	23.562	17.692	5.456	6.078	4.176	0.7958	0.3932
		SY400-AC-13	60.5468	0.728799	21.3642	2.12069	0.0217106	1.24261	1.71534	7.73512	4.27252	0.252206			691.875	10.2625	458	21.1212	726.375	77.7375	32.85	4.77875	0.85375	13.4763	3.68	2.00125
		SY400-AC-10	60.7266	0.645938	21.0448	2.21605	0.0232094	1.26617	1.69783	7.65773	4.47409	0.247554			560	14.4233	289.967	18.9067	1008.67	85.1	29.0667	5.36333	1.57333	6.53667	2.95667	1.60333
		SY400-AC-6	59.4978	0.832002	20.8924	2.64798	0.0552274	1.64909	1.79703	7.73098	4.62631	0.271138			479.375	17.1875	610.75	19.2525	1078.25	69.175	25.975	4.71625	1.77375	17.22	3.2125	1.97375
		SY400-AC-7	56.979	1.06399	20.3993	4.34169	0.0561198	1.87121	2.19568	8.26225	4.62458	0.206188			535.3	12.671	376.2	24.564	1076.4	78.95	31.65	5.558	0.916	8.682	3.421	1.5234
		SY400-AC-8	55.2371	1.24956	19.9015	5.18093	0.068651	2.65779	2.5739	8.46091	4.46765	0.201989			495.667	15.1167	253.767	21.5922	1223.33	64.1111	29.3667	5.67889	1.06444	6.41889	2.47333	1.07289
		SY400-AC-9	54.7656	1.44301	20.0512	5.49453	0.0421031	2.90945	2.67029	7.95082	4.51529	0.15774			476.61	17.36	275.68	23.235	1219.2	58.21	30.07	7.392	1.537	7.252	2.36	1.2431
		SY400-AC-14	54.4236	1.44927	20.1171	5.63291	0.0715443	3.06534	2.89348	7.825	4.34969	0.172006			473.5	20.775	397.363	22.7475	1149.62	73.5625	35.75	7.3075	1.59125	10.9713	2.64125	1.427
		SY400-AC-15	53.9391	1.45458	19.845	5.78779	0.0566257	3.91033	3.58438	7.44514	3.82493	0.152148			465.488	26.145	356.725	18.9537	1060.25	56.4	31.9875	7.78375	2.20875	10.6562	2.14	1.25862
		SY400-AC-16	52.2805	1.46161	19.4409	6.64281	0.0872373	4.92675	4.35927	7.22449	3.4214	0.15503			417.6	34.775	297.825	16.565	917.375	68.85	36.5125	8.30125	3.145	8.47625	2.92125	1.07563
		SY400-AC-17	51.8225	1.35223	19.0478	6.82425	0.0945427	5.96959	5.08214	6.61739	3.05148	0.138104			418.125	61.5375	345.025	15.8975	914.125	91.7875	45.3625	10.3625	6.05125	9.3275	4.87	1.207
