# Supplementary material for: Arc-like magmas generated by mélange-peridotite interaction in the mantle wedge
Source: Nat Commun. 2018 Jul 20;9:2864. doi: 10.1038/s41467-018-05313-2 (PMC6054672; doi:10.1038/s41467-018-05313-2)
Supplement: Supplementary file 8 — Supplementary Data 5 [file 41467_2018_5313_MOESM8_ESM.xlsx]

## Sheet: Dataset 5
Dataset 5. Major element composition of mineral phases analyzed by EPMA
	Major elements (wt. %) normalized to 100
	Olivine										Clinopyroxene												Orthopyroxene
	n*	SiO2	TiO2	Al2O3	FeOT	MnO	MgO	CaO	NiO		n*	SiO2	TiO2	Al2O3	FeOT	MnO	MgO	CaO	Na2O	K2O	Cr2O3		n*	SiO2	TiO2	Al2O3	FeOT	MnO	MgO	CaO	Na2O	K2O	Cr2O3
PER-SED 95-5_1150_96	10	40.679	-	0.0483289	7.28757	0.105212	51.5293	0.140216	0.206661		6	49.0325	0.815746	10.4762	3.45468	0.134262	18.5151	16.8328	0.458301	-	0.261675		10	54.8046	0.163496	4.79794	5.45088	0.126372	32.8753	1.27127	0.0651027	-	0.442157
		0.407498	-	0.0262036	0.284193	0.022349	0.428693	0.0182941	0.0776973			1.45333	0.171096	1.83403	0.32117	0.0207238	2.36	1.62916	0.0705668	-	0.130086			1.21931	0.0616299	1.52736	0.344603	0.0190751	1.56157	0.518747	0.0532818	-	0.192623
PER-SED 95-5_1280_24	9	41.3383	-	0.0695803	5.30387	0.0943758	52.8084	0.234176	0.134916		6	53.1444	0.223154	5.83025	2.66998	0.0984106	21.0029	16.1116	0.604289	-	0.312426		6	55.8077	0.11229	4.79171	3.57102	0.0947551	33.0935	2.03336	0.116572	-	0.375581
		0.0910281	-	0.0145698	0.142984	0.0163672	0.278164	0.0148152	0.0170183			0.601844	0.03379	0.892069	0.366247	0.0290738	0.780256	1.03995	0.0372877	-	0.0683569			0.809032	0.0632202	1.45225	0.416053	0.0052176	0.338428	0.11	0.00425245	-	0.204988
PER-SED 95-5_1280_48	8	41.5897	0.0300848	-	4.61182	0.072163	53.0366	0.352508	0.0181291		4	52.1791	0.37644	7.55865	2.36115	0.109921	20.4716	15.6846	0.746411	-	0.489894		4	55.597	0.135707	5.32961	3.72426	0.11468	33.0108	1.7782	0.11842	-	0.188376
		0.436166	0.0214417	-	0.699223	0.0174912	1.29689	0.263592	0.015488			0.677299	0.105985	0.873327	0.277293	0.00206317	0.508789	0.587537	0.187438	-	0.261226			1.00704	0.0688495	1.77498	0.606201	0.0101071	0.875745	0.428264	0.0279797	-	0.14792
PER-SED 95-5_1280_72	8	40.8395	-	0.101632	6.62011	0.0952925	51.8884	0.249006	0.203815		1	52.9724	0.243516	5.46343	3.53282	0.11315	23.3266	13.2157	0.663971	-	0.464839		1	54.7048	0.166452	5.86433	4.69884	0.135807	32.0144	1.78844	0.264012	-	0.361974
		0.182674	-	0.0449113	0.46186	0.0130068	0.428619	0.045842	0.180567			-	-	-	-	-	-	-	-	-	-			0.81304	0.0621725	1.44756	0.155027	0.00724592	0.440719	0.07	0.238376	-	0.0453383
PER-SED 95-5_1280_96	6	41.2434	-	0.0751309	5.43486	0.115457	52.7673	0.217829	0.13803		6	52.4347	0.327797	6.82849	2.57954	0.0924723	19.9533	16.6758	0.874309	-	0.233568		6	55.1835	0.150098	5.51952	3.93557	0.125911	32.5556	2.07171	0.166658	-	0.290223
		0.135941	-	0.0109083	0.612296	0.00717914	0.5796	0.0113738	0.0256128			0.362146	0.0596544	0.733014	0.329949	0.0171632	0.479333	0.786225	0.0943727	-	0.0335388			0.725132	0.0380929	1.24468	0.697041	0.0178965	0.308183	0.0857904	0.0169368	-	0.0824412
PER-SED 95-5_1315_72	10	41.7557	0.0176328	0.0529586	4.29459	0.0882744	53.5537	0.208075	0.0290528		10	51.6729	0.429277	6.11072	2.84688	0.089012	16.6389	20.3407	1.1127	-	0.756458		10	57.0908	-	2.52599	3.12436	0.107596	34.8057	1.49881	0.0551682	-	0.786862
		0.202824	0.00845895	0.0280465	0.126122	0.0177835	0.514561	0.0251287	0.0107768			0.659137	0.101593	1.02557	0.355633	0.0149515	1.17931	0.546308	0.515312	-	0.169583			0.253826	-	0.39635	0.250856	0.0239012	0.275391	0.0839023	0.0217236	-	0.1177
PER-SED 85-15_1230_96	13	40.4861	-	0.0198561	9.17805	0.130616	49.9229	0.164581	0.091473		10	47.8041	1.13697	10.0078	6.40726	0.139404	15.2359	18.3518	0.610822	-	0.257776		15	55.6298	0.0761093	2.58538	5.73707	0.134117	33.3149	1.61882	0.0543289	-	0.847366
		0.132851	-	0.0136237	0.0749527	0.0224576	0.126014	0.0182621	0.0310731			1.97541	0.248483	1.86879	0.991634	0.0216055	2.69257	2.01619	0.204337	-	0.0899034			0.158923	0.017311	0.193747	0.114204	0.0137688	0.207165	0.122399	0.0306517	-	0.138153
PER-SED 85-15_1280_72	5	41.8665	-	-	5.01729	0.122965	52.4066	0.273504	0.0913828		6	53.0803	0.313945	6.33201	2.82584	0.110362	20.6321	15.6259	0.807132	0.00758314	0.26473		6	56.1617	0.126834	4.04103	4.40839	0.123093	33.1837	1.56486	0.113615	-	0.276716
		0.572861	-	-	0.0460435	0.0203863	0.826238	0.0745462	0.0387911			0.348411	0.0481051	0.814862	0.423387	0.0101384	0.917162	0.909214	0.0908945	0.00443775	0.100074			0.790114	0.0333669	0.934446	0.680999	0.0174614	0.962185	0.747604	0.0274529	-	0.205739
PER-SED 85-15_1315_72	10	41.8067	-	0.074643	3.54766	0.0876481	54.1928	0.253195	0.0344382		4	54.2498	0.187008	4.73161	1.97398	0.109735	22.1131	15.5116	0.686827	-	0.434747		4	57.0048	0.085221	2.7654	3.51973	0.109168	34.2752	1.79109	0.0993843	-	0.34888
		0.164685	-	0.00686136	0.0521643	0.0195427	0.196709	0.015963	0.0330861			0.543875	0.0238724	0.475605	0.11225	0.00994129	0.375622	1.12831	0.0140672	-	0.420497			0.592832	0.0418807	1.37809	0.429337	0.0159038	1.20346	0.475003	0.0159062	-	0.158546
PER-SERP 85-15_1230_96	13	39.5872	-	0.0351018	11.0148	0.162733	48.8238	0.199957	0.176298		12	52.0629	0.162474	3.94621	4.29566	0.122721	19.1137	18.7418	0.646487	-	0.907213		15	54.3529	0.0740082	3.28283	7.01259	0.154027	32.7773	1.67858	0.0782923	-	0.588469
		0.127945	-	0.00933993	0.254178	0.0226584	0.288751	0.0170889	0.0163191			0.344475	0.094739	0.474651	0.244359	0.0130376	0.676548	0.514072	0.169391	-	0.0976743			0.296049	0.0167612	0.186844	0.248532	0.0128827	0.36448	0.265918	0.0293787	-	0.154171
PER-SERP 85-15_1280_72	10	41.1849	-	0.119115	6.01264	0.114169	52.0236	0.263281	0.275852		6	52.975	0.226099	5.91469	2.82126	0.1324	21.1976	15.7194	0.768412	-	0.243973		6	55.6044	0.123107	4.83736	4.2748	0.132202	32.6017	2.06498	0.161189	-	0.200047
		0.394073	-	0.109135	0.935633	0.0229271	1.1288	0.0385713	0.0570711			0.556109	0.0703693	0.86007	0.85362	0.0220808	0.977843	0.963943	0.0904427	-	0.0510666			0.370805	0.00999888	0.420175	0.429278	0.0120757	0.422185	0.159332	0.0157775	-	0.0840289
PER-SERP 85-15_1315_72	6	41.6661	-	0.0656428	3.9181	0.103465	53.9221	0.248359	0.0647367		6	54.1358	0.150206	4.85006	2.06724	0.104141	22.6618	15.168	0.61777	-	0.244922		6	57.2211	0.0749741	2.98876	2.95951	0.112622	34.3645	1.96892	0.144674	-	0.16233
		0.133679	-	0.0114577	0.614766	0.0235022	0.730354	0.00803577	0.031418			0.538331	0.0291176	0.516643	0.412505	0.0115078	0.836837	0.885447	0.0446546	-	0.0593912			0.586285	0.0230872	1.17061	0.462331	0.0272059	0.728025	0.535784	0.0298696	-	0.0868758
PER-SERP 85-15_1350_72	6	41.6013	-	0.0609216	3.70849	0.118514	54.1537	0.276757	0.0773982		6	54.3163	0.103149	4.32094	2.05508	0.120687	23.2629	15.0409	0.525807	-	0.253196		6	57.9044	0.0453781	2.0727	2.79436	0.11566	34.6597	2.12798	0.107305	-	0.169755
		0.0660303	-	0.011387	0.0831264	0.0261817	0.180407	0.018928	0.0319504			0.489479	0.0182702	0.572736	0.172163	0.0134742	0.911411	0.892181	0.0318138	-	0.0460281			0.609656	0.0160308	0.493685	0.0684105	0.0187963	0.21312	0.324238	0.0256892	-	0.0540626
*n indicates number of individual analysis
numbers in italics are ± 1 s.d
